# Supplementary material for: Synthesis and catalytic properties of La or Ce doped hydroxy-FeAl intercalated montmorillonite used as heterogeneous photo Fenton catalysts under sunlight irradiation
Source: Royal Society of Chemistry journal article supplement (doi:10.1039/c3ra46729e), 2014-01-01
Supplement: c3ra46729e.pdf [file c3ra46729e.pdf]

## Supporting information

### **Synthesis and catalytic performance of La or Ce doped hydroxy-FeAl intercalated montmorillonite used as heterogeneous photo Fenton catalysts under sunlight irradiation**

Zhujian Huang,<sup>abc</sup> Pingxiao Wu,<sup>\*abc</sup> Hailing Li,<sup>a</sup> Wen Li,<sup>a</sup> Yajie Zhu<sup>a</sup> and Nengwu Zhu<sup>abc</sup>

<sup>a</sup> *College of Environment and Energy, South China University of Technology, Guangzhou  
510006, P.R. China*

<sup>b</sup> *The Key Lab of Pollution Control and Ecosystem Restoration in Industry Clusters, Ministry  
of Education, Guangzhou 510006, P.R. China*

<sup>c</sup> *The Key Laboratory of Environmental Protection and Eco-Remediation of Guangdong  
Regular Higher Education Institutions*

\*Corresponding author: Tel.: +86-20-39380538; Fax: +86-20-39383725.

*E-mail:* pppxwu@scut.edu.cn (P.X. Wu).

**Table S1:** Main characteristics of C.I. Reactive Blue 19 (RB19)

| Characteristics   | C.I. Reactive Blue 19                                                              |
|-------------------|------------------------------------------------------------------------------------|
| Structure         | 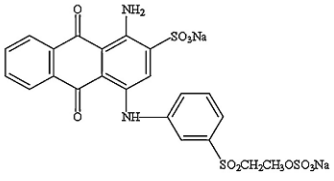 |
| Molecular formula | $C_{22}H_{16}O_{11}N_2S_3Na_2$                                                     |
| Molecular weight  | 626.6 g/mol                                                                        |
| $\lambda_{max}$   | 590 nm                                                                             |

**Table S2:** Infrared frequencies and assignment of montmorillonite samples.

| Position/cm <sup>-1</sup> | Assignments                                 |
|---------------------------|---------------------------------------------|
| 3624                      | OH stretching of structural hydroxyl groups |
| 3434                      | OH stretching of H <sub>2</sub> O           |
| 1641                      | OH deformation of H <sub>2</sub> O          |
| 1087                      | Si-O stretching of cristobalite             |
| 1034                      | Si-O stretching                             |
| 915                       | Al-Al-OH deformation of structure           |
| 795                       | Si-O stretching of cristobalite             |
| 625                       | Coupling of Al-O and Si-O, out of plane     |
| 518                       | Al-O-Si deformation                         |
| 467                       | Si-O-Fe deformation                         |

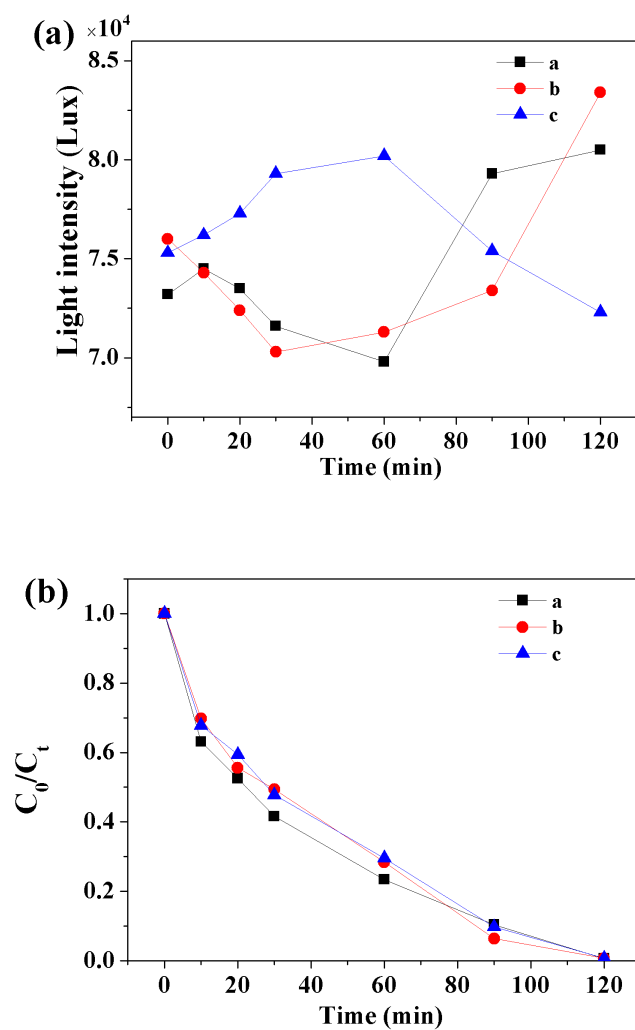

**Fig. S1.** Effect of sunlight intensity on the catalytic degradation performance.

(exemplified by FeAl/Ce1.0-Mt). The experimental conditions: initial concentration of 0.12 mM RB19, 14.7 mM  $H_2O_2$ , catalyst dosage 0.5 g/L, pH 3.0.

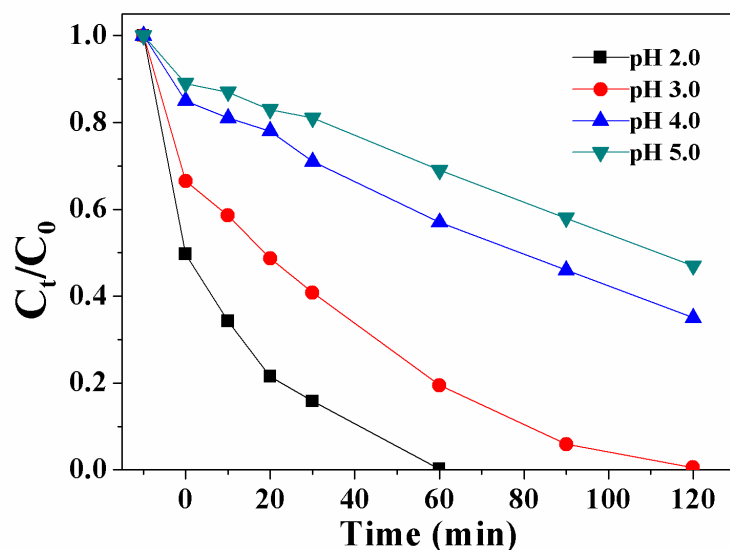

**Fig. S2.** The effect of initial pH on the catalytic performance of heterogeneous photo Fenton reaction (exemplified by FeAl/Ce1.0-Mt). The experimental conditions: initial concentration of 0.12 mM RB19, 14.7 mM H<sub>2</sub>O<sub>2</sub>, catalyst dosage 0.5 g/L.

The pH at which reaction takes place plays an important role in the catalytic performance of heterogeneous photo Fenton reaction. A set of experiments was conducted to investigate the effect of initial pHs ranging from 2.0 to 5.0 on the decolorization of RB19. As is presented in Fig. S2, the catalytic performance is significantly affected by the initial pHs. Obviously, the final decolorization efficiency of RB19 increased from 53.6% to 99.6% when the initial pH was decreased from 5.0 to 2.0. Based on the observation, pH 3.0 was chosen as the optimum pH in this reaction system for further experiments.

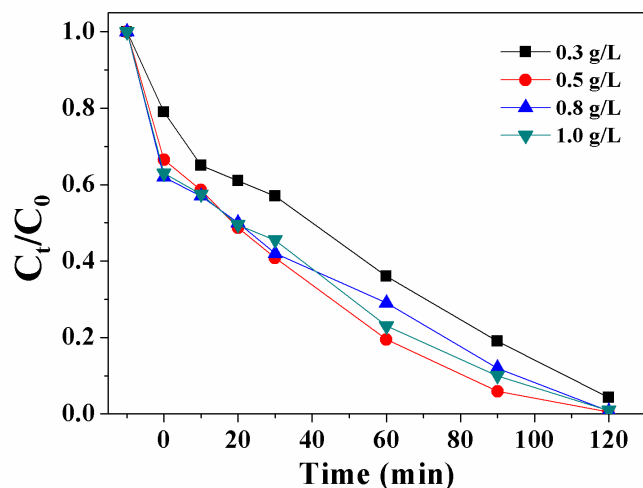

**Fig. S3.** The effect of catalyst dosage on the catalytic performance of heterogeneous photo Fenton reaction (exemplified by FeAl/Ce1.0-Mt). The experimental conditions: initial concentration of 0.12 mM RB19, 14.7 mM H<sub>2</sub>O<sub>2</sub>, pH 3.0.

The effect of catalyst dosage on the catalytic performance of RB19 decolorization was investigated by varying the catalyst dosage from 0.3 to 1.0 g/L. As can be seen in Fig. S3, the curves of decolorization efficiency of RB19 as a function of time were similar with the catalyst dose ranging from 0.5 g/L to 1.0 g/L. It is believed that the obtained catalyst employed as a Fenton catalyst could accelerate the decomposition of H<sub>2</sub>O<sub>2</sub> and more ·OH radicals are generated with increment of catalyst dosage. In fact, catalyst particles would make the reaction solution turbid if the dosage of catalyst was high, as a result, the penetration of sunlight was diminished, which hampered the production of ·OH radicals. Taken consideration of the cost, a suitable catalyst dosage for the removal of RB19 by heterogeneous photo Fenton reaction under sunlight irradiation is 0.5 g/L at an initial concentration of the RB19 and H<sub>2</sub>O<sub>2</sub> mentioned above.

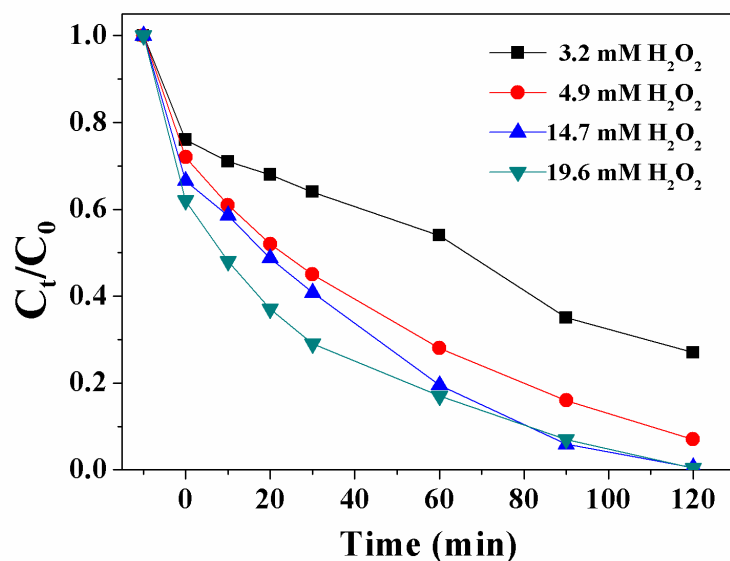

**Fig. S4.** The effect of initial concentration of H<sub>2</sub>O<sub>2</sub> on the catalytic performance of heterogeneous photo Fenton reaction (exemplified by FeAl/Ce1.0-Mt). The experimental conditions: initial concentration of 0.12 mM RB19, catalyst dosage 0.5 g/L, pH 3.0.

The effect of initial concentration of H<sub>2</sub>O<sub>2</sub> on the catalytic performance of heterogeneous photo Fenton reaction was studied. As can be observed, with increasing initial concentration of H<sub>2</sub>O<sub>2</sub> from 3.2 to 19.6 mM, the decolorization efficiency of RB19 went up from 36.1% to 71.4% at 30 min. The increase of decolorization rate by adding more H<sub>2</sub>O<sub>2</sub> resulted from the increase of ·OH radicals. However, when the initial concentration of H<sub>2</sub>O<sub>2</sub> reached 14.7 mM, the decolorization efficiency of RB19 decreased slightly. The number of ·OH radicals in solution decreases because the scavenging of ·OH radicals occurs at a higher concentration of H<sub>2</sub>O<sub>2</sub>. This process can be proposed to follow the reaction formulas

as listed below (Eqs. (R1)–(R2)).

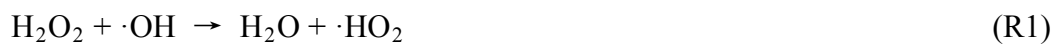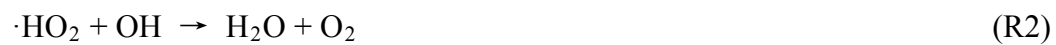

Therefore, a suitable initial  $\text{H}_2\text{O}_2$  concentration of 14.7 mM can be regarded as the optimum initial concentration for the removal of RB19 by heterogeneous photo-Fenton reaction.
